# Supplementary material for: Influence of SPIO labelling on the function of BMSCs in chemokine receptors expression and chemotaxis
Source: PeerJ. 2023 Jun 2;11:e15388. doi: 10.7717/peerj.15388 (PMC10241165; doi:10.7717/peerj.15388)
Supplement: Supplemental Information 1 [file peerj-11-15388-s001.xlsx]

## Sheet: Sheet1
Prussin blue dying, possitive cell rate
	SPIO, 25ug/ml			SPIO, 50ug/ml			SPIO, 75ug/ml
24h	0.62	0.8	0.62	0.54	0.56	0.54	0.67	0.57	0.79
48h	0.89	0.89	0.92	0.98	0.97	0.99	0.95	0.97	0.96
72h	0.9	0.87	0.76	0.84	0.87	0.73	0.62	0.54	0.49
trypan blue dying, negative cell rate
	control			SPIO, 25ug/ml			SPIO, 50ug/ml			SPIO, 75ug/ml
24h	0.95	0.98	0.99	0.97	0.99	0.98	0.88	0.9	0.96	0.96	0.98	0.98
48h	0.97	0.97	0.97	0.98	0.99	0.96	0.95	0.9	0.88	0.97	0.92	0.97
72h	0.98	0.98	0.95	0.98	0.99	0.99	0.98	0.98	0.99	0.96	0.96	0.95
CCK-8 test
	24h					48h					72h
control	0.693	0.66	0.563	0.578	0.59	0.824	0.819	0.779	0.787	0.732	1.562	1.412	1.247	1.146	1.059
SPIO, 25ug/ml	0.803	0.806	0.627	0.534	0.542	0.932	0.788	0.778	0.803	0.837	1.226	1.452	1.214	1.12	0.996
SPIO, 50ug/ml	0.767	0.715	0.551	0.695	0.745	0.843	0.769	0.713	0.758	0.778	1.365	1.019	1.153	1.113	1.057
SPIO, 75ug/ml	0.72	0.797	1.011	1.912	0.711	0.72	0.763	0.733	0.742	0.677	1.207	1.276	1.152	1.205	0.929
