# Supplementary material for: Influence of SPIO labelling on the function of BMSCs in chemokine receptors expression and chemotaxis
Source: PeerJ. 2023 Jun 2;11:e15388. doi: 10.7717/peerj.15388 (PMC10241165; doi:10.7717/peerj.15388)
Supplement: Supplemental Information 2 [file peerj-11-15388-s002.xlsx]

## Sheet: Sheet1
CT value of RT-PCR
	0*24			0*48			0*72			25*24			25*48			25*72			50*24			50*48			50*72			75*24			75*48			75*72
CCR5	1.40769	1.22547	1.50873	3.45815	2.82843	3.81055	1.53333	1.53333	2.15348	2.71948	2.20891	2.43401	3.81055	4.34694	5.06303	1.04488	1.00928	0.948246	0.775572	0.283876	2.23974	1.69741	1.7211	1.76949	1.84463	1.90968	2.22427	1.89649	2.27101	2.06098	1.48796	1.2086	1.85746	2.02324	2.08012	1.9816
CCR10	2.63902	1.23114	1.6245	5.73582	3.18215	4.14106	4.10296	1.15402	2.16845	3.06666	2.63293	3.67226	5.55325	5.4768	5.59188	1.33793	1.37554	1.10191	1.07425	0.974905	0.954842	2.52567	3.6978	1.12246	2.50244	2.79594	2.27101	2.61474	3.33264	2.06575	3.53898	1.73307	1.10445	2.68204	2.46798	2.55502
CXCR3	1.68568	1.60585	1.94981	3.38698	4.31691	5.16941	2.16845	2.22942	2.12383	2.83497	3.51453	2.97592	6.30574	5.52765	4.87927	1.66248	0.608502	2.00463	1.11471	1.07674	0.833161	1.9816	2.90123	1.82344	2.01857	2.50244	3.1456	2.28153	2.58471	3.05252	1.94082	1.86176	1.87471	2.56093	2.45661	2.68825
CXCR5	1.75727	1.7818	1.68568	4.21831	3.30962	5.41389	2.27101	1.64718	2.51403	3.10947	2.9622	3.21912	6.17597	4.61608	5.9656	1.27751	1.11729	1.39474	1.32869	0.752623	0.566442	2.12383	2.42279	2.03731	3.01746	2.41719	2.1785	3.05958	2.31873	2.53737	2.40605	1.73708	1.62076	2.56093	2.61474	2.52567
IL11	1.23399	1.11987	1.32256	2.07532	2.1785	2.00463	1.55833	2.15846	2.09943	1.59844	1.65481	1.62076	4.08405	2.77022	4.14106	3.98156	2.27101	2.71948	1.34102	1.31342	2.19365	0.97041	1.03288	0.997692	1.68958	1.36289	1.51222	0.918064	1.42076	1.13813	1.34412	1.15402	1.57644	1.75727	1.81924	1.7211
IL6	1.000000	1.18099	1.09809	4.26733	3.21169	2.80565	1.66248	2.04675	2.4005	3.35582	1.75828	1.43561	4.78991	3.97237	4.36203	2.11038	2.77022	2.1848	3.63008	2.02792	3.20428	2.56685	1.7411	2.62079	6.85267	4.17468	3.80176	1.66248	1.31342	1.07425	2.13613	1.96564	2.87787	3.43426	3.18215	2.77022
CXCR7	0.670511	1.08925	1.35974	3.24151	2.8219	3.00355	3.05958	3.46615	3.56359	4.34694	1.90528	1.42405	5.80247	7.04533	5.45155	3.80176	3.26406	4.10296	9.16838	7.49884	4.77886	2.04675	2.23974	2.85469	3.01049	2.67586	2.31338	2.14355	2.37841	1.86607	1.90968	4.51064	1.06683	7.48153	4.93597	1.88339
