# Supplementary material for: Influence of SPIO labelling on the function of BMSCs in chemokine receptors expression and chemotaxis
Source: PeerJ. 2023 Jun 2;11:e15388. doi: 10.7717/peerj.15388 (PMC10241165; doi:10.7717/peerj.15388)
Supplement: Supplemental Information 3 [file peerj-11-15388-s003.xlsx]

## Sheet: Sheet1
CXCR3 expression testing by flowcytometry
	control group							SPIO, 25ug/ml							SPIO, 50ug/ml							SPIO, 75ug/ml
24h	46.15	22.18	45.21	76.13	51.59	80.78	27.64	23.01	25.38	32.3	22.51	24.77	27.97	30.17	19.12	21.22	19.95	17.52	16.98	23.95	26.65	28.24	14.58	25.79	25.11	23.9	17.3	30.8
48h	81.7	95.4	66.8	70.4	90.4	71.3	90	70.1	70	86.9	59.4	58.7	76.3	75.8	62.8	72.3	69.8	61.8	58	60	56.8	73.5	64.2	61.9	37.2	58.6	70.1	53.5
72h	60.1	72.8	66.5	57.29	48.41	65.8	72.2	66.5	64.5	54.4	43.04	38.85	69.5	71.4	53.4	58.9	58	32.17	42.3	64.3	56.4	46.2	43.9	34.05	29.85	30.44	47.9	47.5
CCR10 expression testing by flowcytometry
	control group							SPIO, 25ug/ml							SPIO, 50ug/ml							SPIO, 75ug/ml
24h	41.46	68.34	18.3	41.9	70.08	51.04	30.71	20.18	21.89	17.69	19.21	20.68	39	39.4	17.73	19.5	17.72	16.12	17.29	38.8	40	25.93	22.34	26.04	24.76	24.76	46.5	36.7
48h	51.19	44.7	45.38	51.43	55	39.8	47.4	36.4	31.68	49.89	45.02	47.01	48.34	43.29	35.48	25.16	42.6	51.3	39.6	40.26	39.4	22.82	21.12	44.1	42.3	37.03	35.1	34.14
72h	42.7	69.3	19.3	36.3	58.8	37.3	60	20	21.5	23.3	22.8	20.1	18	19.4	16.7	18.2	16.7	23.2	19.2	17	17.6	25.1	22.1	25.6	26.7	26.68	24.83	24.62
CXCR7 expression testing by flowcytometry
	control group							SPIO, 25ug/ml							SPIO, 50ug/ml							SPIO, 75ug/ml
24h	59.4	79.37	56.7	73	70	66.5	68.9	5.54	10.72	11	9.86	20.22	3.42	32.45	52.79	3	3.1	3.83	6.45	7.15	43.32	36.11	2.61	2.25	3.79	4.98	4.86	36.4
48h	74.83	67.12	61.6	65.73	73.43	77.8	59.63	17.7	23.3	39.18	29.5	34.21	22.92	43.43	26.11	6.73	8.16	7.53	10.41	13.02	26.69	4.83	20.87	3.15	7.63	4.79	5.48	23.2
72h	51.7	48.84	49.03	47.95	65.1	65.62	42.94	15.72	31.85	36.22	34.32	7.84	14.6	18.41	13.2	11.6	18.82	11.92	17.5	27.5	20.11	8.48	10.5	10.91	10.3	11.3	13.9	13.8
CXCR4 expression testing by flowcytometry
	control group							SPIO, 25ug/ml							SPIO, 50ug/ml							SPIO, 75ug/ml
24h	93	92.5	95.9	96.2	95.3	97	93.8	91.42	96.4	95.03	95.35	89.2	97.52	89.4	85.9	66.78	65.99	63.58	76.52	74.23	80.1	57.71	62.53	70.5	67.21	72.12	61.23	74.8
48h	87.5	88.3	85.1	93.4	87.3	93.2	85.2	94.3	96.9	96.52	98.34	95.9	94.8	97	95.3	95.2	95.6	83.5	85.3	96.8	97	97.58	97.26	97.9	89.5	90.1	98.3	98.1
72h	94.6	94.3	95	94.8	96.9	95.5	91.2	95.2	94.8	94.3	90.5	96.9	96.7	91.4	87.15	93.02	92.14	92.22	83.4	95.2	84.9	88.53	89.86	92.05	92.93	93.68	80.8	81
