# Supplementary material for: Influence of SPIO labelling on the function of BMSCs in chemokine receptors expression and chemotaxis
Source: PeerJ. 2023 Jun 2;11:e15388. doi: 10.7717/peerj.15388 (PMC10241165; doi:10.7717/peerj.15388)
Supplement: Supplemental Information 4 [file peerj-11-15388-s004.xlsx]

## Sheet: Sheet1
transwell assay
	BMSC			BMSC+SPIO
CXCL10	80	75	90	75	77	72
CXCL10+TAK799	30	25	33	33	30	34
CCL4	82	88	76	84	82	80
CCL4+MARAVIORIC	18	15	21	30	27	25
CCL19	70	72	66	67	68	70
CCL19+LY294002	20	24	16	29	28	32
